# Supplementary material for: Incidence of Swimming-Induced Pulmonary Edema: A Cohort Study Based on 47,600 Open-Water Swimming Distances
Source: PubMed Central journal article supplement — Chest. 2021 Jun 26;160(5):1789–98. doi: 10.1016/j.chest.2021.06.034 (PMC8628172; doi:10.1016/j.chest.2021.06.034), 2021-06-26
Supplement: mmc1.pdf [file mmc1.pdf]

# Incidence of Swimming-Induced Pulmonary Edema

## A Cohort Study Based on 47,600 Open-Water Swimming Distances

*Maria Hårdstedt, MD, PhD; Linda Kristiansson, MD; Claudia Seiler, MD; Annika Braman Eriksson, MD; and Josefin Sundh, MD, PhD*

CHEST 2021; 160(5):1789-1798

*Online supplements are not copyedited prior to posting and the author(s) take full responsibility for the accuracy of all data.*

© 2021 AMERICAN COLLEGE OF CHEST PHYSICIANS. Reproduction of this article is prohibited without written permission from the American College of Chest Physicians. See online for more details. DOI: 10.1016/j.chest.2021.06.034

**e-Table 1. Participants in the swimming races of Vansbrosimningen 2016-2019**

|                                                     | <b>2016</b> | <b>2017</b> | <b>2018</b> | <b>2019</b> | <b>Total</b>     |
|-----------------------------------------------------|-------------|-------------|-------------|-------------|------------------|
| Total swimming distances ≥18 y (n)                  | 13380       | 12518       | 11413       | 10262       | 47573            |
| Total individuals ≥18 y (n)                         | 13006       | 12087       | 11010       | 9810        | 45913            |
| Individuals swimming >1 race in one year ≥18 y* (n) | 315         | 339         | 330         | 361         | 1345             |
| Total swimming distances <18 y (n)                  | 386         | 379         | 474         | 492         | 1731             |
| Total individuals <18 y (n)                         | 361         | 353         | 436         | 435         | 1585             |
| Individuals swimming >1 race in one year <18 y (n)  | 22          | 20          | 31          | 44          | 117              |
| <b>Distances swum for participants ≥18 years</b>    |             |             |             |             | <b>Total</b>     |
| Men 3000 m (n)                                      | 5670        | 5487        | 4847        | 4330        | 20334            |
| 1500 m (n)                                          | 402         | 423         | 395         | 310         | 1530             |
| 1000 m (n)                                          | 64          | 66          | 79          | 148         | 357              |
| Women 3000 m (n)                                    | 3138        | 3072        | 2940        | 2546        | 11696            |
| 1500 m (n)                                          | 1119        | 1008        | 951         | 863         | 3941             |
| 1000 m (n)                                          | 2987        | 2462        | 2201        | 2065        | 9715             |
| <b>Sex and age for patients ≥18 years</b>           |             |             |             |             |                  |
| Men                                                 | 6136        | 5976        | 5321        | 4788        | 22221            |
| Women                                               | 7244        | 6542        | 6092        | 5474        | 25352            |
|                                                     |             |             |             |             | <b>Mean (SD)</b> |
| Age years; mean                                     | 40.0        | 40.2        | 40.8        | 40.9        | 40.4 (0.4)       |
| Age groups                                          |             |             |             |             | <b>Total</b>     |
| 18-30 years (n)                                     | 3487        | 3406        | 2933        | 2760        | 12586            |
| 31-40 years (n)                                     | 3399        | 2963        | 2705        | 2371        | 11438            |



|                                     |            |            |            |            |                  |
|-------------------------------------|------------|------------|------------|------------|------------------|
| 41-50 years (n)                     | 3868       | 3462       | 3098       | 2569       | 12997            |
| 51-60 years (n)                     | 2153       | 2212       | 2137       | 2027       | 8529             |
| ≥61 years (n)                       | 473        | 475        | 540        | 535        | 2023             |
| <b>Speed</b>                        |            |            |            |            |                  |
| < 20 min/km                         | 2010       | 1972       | 2044       | 1675       | 7701             |
| ≥ 20 min/km                         | 11312      | 10454      | 9332       | 8509       | 39607            |
| did not finish the race             | 58         | 92         | 37         | 78         | 265              |
| <b>Temperature</b>                  |            |            |            |            | <b>Mean (SD)</b> |
| Water temperature** (C°); mean (SD) | 17.1 (0.2) | 16.8 (0.3) | 19.5 (0.5) | 15.9 (0.3) | 17.3 (1.5)       |
| Air temperature*** (C°); mean (SD)  | 19.2 (1.8) | 16.9 (1.8) | 21.8 (2.1) | 15.5 (1.6) | 18.3 (6.8)       |

\*27097 individuals participated in one year; 4764 individuals participated in two years, 1604 participated in three years, 1119 participated all four years.

\*\*Water temperature is presented as mean (SD) of hourly measurements 9 am - 6 pm in the river of Vanån and Västerdalälven over the three racing days. Total mean (SD) is given for the four years.

\*\*\*Air temperature is presented as mean (SD) of hourly measurements 9 am - 6 pm in Vansbro over the three racing days. Total mean (SD) is given for the four years.

|                                                       | <b>2016</b> | <b>2017</b> | <b>2018</b> | <b>2019</b> | <b>Total</b> |
|-------------------------------------------------------|-------------|-------------|-------------|-------------|--------------|
| Total swimming distances ≥18 yrs (n)                  | 13380       | 12518       | 11413       | 10262       | 47573        |
| Total individuals ≥18 yrs (n)                         | 13006       | 12087       | 11010       | 9810        | 45913        |
| Individuals swimming >1 race in one year ≥18 yrs* (n) | 315         | 339         | 330         | 361         | 1345         |
| Total swimming distances <18 yrs (n)                  | 386         | 379         | 474         | 492         | 1731         |
| Total individuals <18 yrs (n)                         | 361         | 353         | 436         | 435         | 1585         |
| Individuals swimming >1 race in one year <18 yrs (n)  | 22          | 20          | 31          | 44          | 117          |
| <b>Distances swum for participants ≥18 years</b>      |             |             |             |             | <b>Total</b> |
| Men 3000 m (n)                                        | 5670        | 5487        | 4847        | 4330        | 20327        |
| 1500 m (n)                                            | 402         | 423         | 395         | 310         | 1530         |
| 1000 m (n)                                            | 64          | 66          | 79          | 148         | 358          |



|                                           |                         |            |            |            |            |                  |
|-------------------------------------------|-------------------------|------------|------------|------------|------------|------------------|
| Women                                     | 3000 m (n)              | 3138       | 3072       | 2940       | 2546       | 11696            |
|                                           | 1500 m (n)              | 1119       | 1008       | 951        | 863        | 3941             |
|                                           | 1000 m (n)              | 2987       | 2462       | 2201       | 2065       | 9715             |
| <b>Sex and age for patients ≥18 years</b> |                         |            |            |            |            |                  |
| Men                                       |                         | 6136       | 5976       | 5321       | 4788       | 22221            |
| Women                                     |                         | 7244       | 6542       | 6092       | 5474       | 25352            |
|                                           |                         |            |            |            |            | <b>Mean (SD)</b> |
| Age years; mean                           |                         | 40.0       | 40.2       | 40.8       | 40.9       | 40.4 (0.4)       |
| Age groups                                |                         |            |            |            |            | <b>Total</b>     |
|                                           | 18-30 years (n)         | 3487       | 3406       | 2933       | 2760       | 12586            |
|                                           | 31-40 years (n)         | 3399       | 2963       | 2705       | 2371       | 11438            |
|                                           | 41-50 years (n)         | 3868       | 3462       | 3098       | 2569       | 12997            |
|                                           | 51-60 years (n)         | 2153       | 2212       | 2137       | 2027       | 8529             |
|                                           | ≥61 år (n)              | 473        | 475        | 540        | 535        | 2023             |
| <b>Speed</b>                              |                         |            |            |            |            |                  |
|                                           | < 20 min/km             | 2010       | 1972       | 2044       | 1675       | 7701             |
|                                           | ≥ 20 min/km             | 11312      | 10454      | 9332       | 8509       | 39607            |
|                                           | did not finish the race | 58         | 92         | 37         | 78         | 265              |
|                                           |                         |            |            |            |            | <b>Mean (SD)</b> |
| <b>Temperature</b>                        |                         |            |            |            |            |                  |
| Water temperature** (C°); mean (SD)       |                         | 17.1 (0.2) | 16.8 (0.3) | 19.5 (0.5) | 15.9 (0.3) | 17.3 (1.5)       |
| Air temperature*** (C°); mean (SD)        |                         | 19.2 (1.8) | 16.9 (1.8) | 21.8 (2.1) | 15.5 (1.6) | 18.3 (6.8)       |

\*27097 individuals participated in one year; 9528 individuals participated in two years, 4812 participated in three years, 4476 participated all four years.

\*\*Water temperature is presented as mean (SD) of hourly measurements 9 am - 6 pm in the river of Vanån and Västerdalälven over the three racing days. Total mean (SD) is given for the four years.

\*\*\*Air temperature is presented as mean (SD) of hourly measurements 9 am - 6 pm in Vansbro over the three racing days. Total mean (SD) is given for the four years.

Information on races swum and age/sex groups of all participants during the swimming races of Vansbrosimningen in 2016-2019. Individuals turning 18 years old the same year as participating in the swimming event were counted as adult participants (≥18 years).

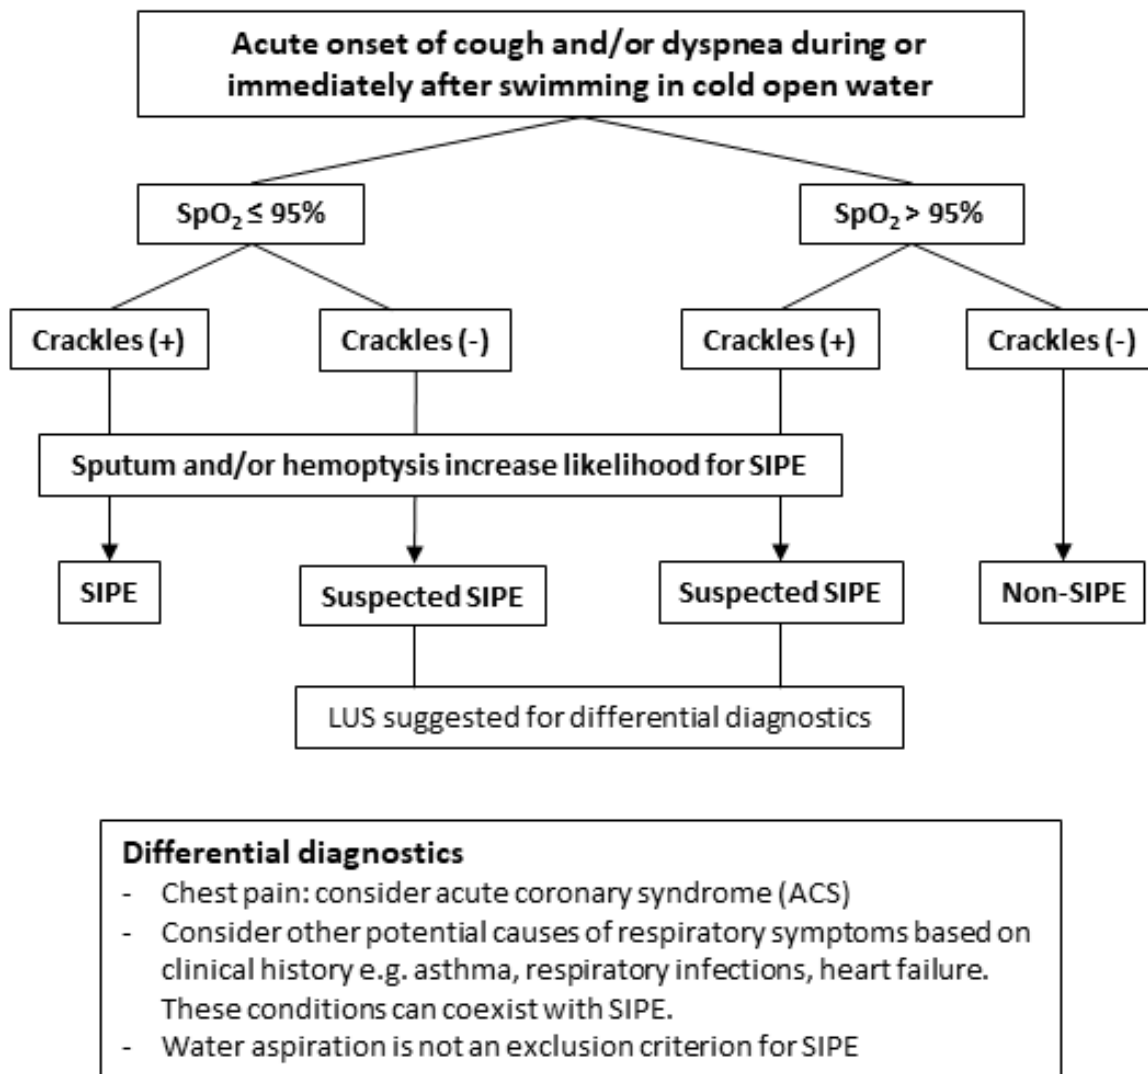

**e-Figure 1:** Suggested algorithm for SIPE diagnosis in patients with acute onset of cough and/or dyspnea during swimming in open water. The algorithm is based on peripheral oxygen saturation (SpO2) and crackles on lung auscultation, with excessive sputum and/or hemoptysis supporting diagnosis. Patients with findings of crackles and SpO2 ≤95% could be diagnosed with SIPE based on clinical evaluation. For patients with findings of crackles or SpO2 ≤95%, lung ultrasound (LUS) is suggested for differential diagnosis if available. Previously published by Hårdstedt et al, CHEST 2020.
